# Supplementary material for: Reactant-induced photoactivation of in situ generated organogold intermediates leading to alkynylated indoles via Csp2-Csp cross-coupling
Source: PubMed Central journal article supplement (PMC9051093; doi:10.1038/s41467-022-29982-2), 2022-04-28
Supplement: 41467_2022_29982_MOESM2_ESM.pdf [file 41467_2022_29982_MOESM2_ESM.pdf]

## **Description of Additional Supplementary files**

File name : Supplementary Data 1

Description : Supplementary Table 3: Cartesian coordinates of the optimized structures of the compounds involved in this work.
